# Supplementary material for: Gas5 is an essential lncRNA regulator for self-renewal and pluripotency of mouse embryonic stem cells and induced pluripotent stem cells
Source: PubMed Central journal article supplement (PMC5863440; doi:10.1186/s13287-018-0813-5), 2018-03-21

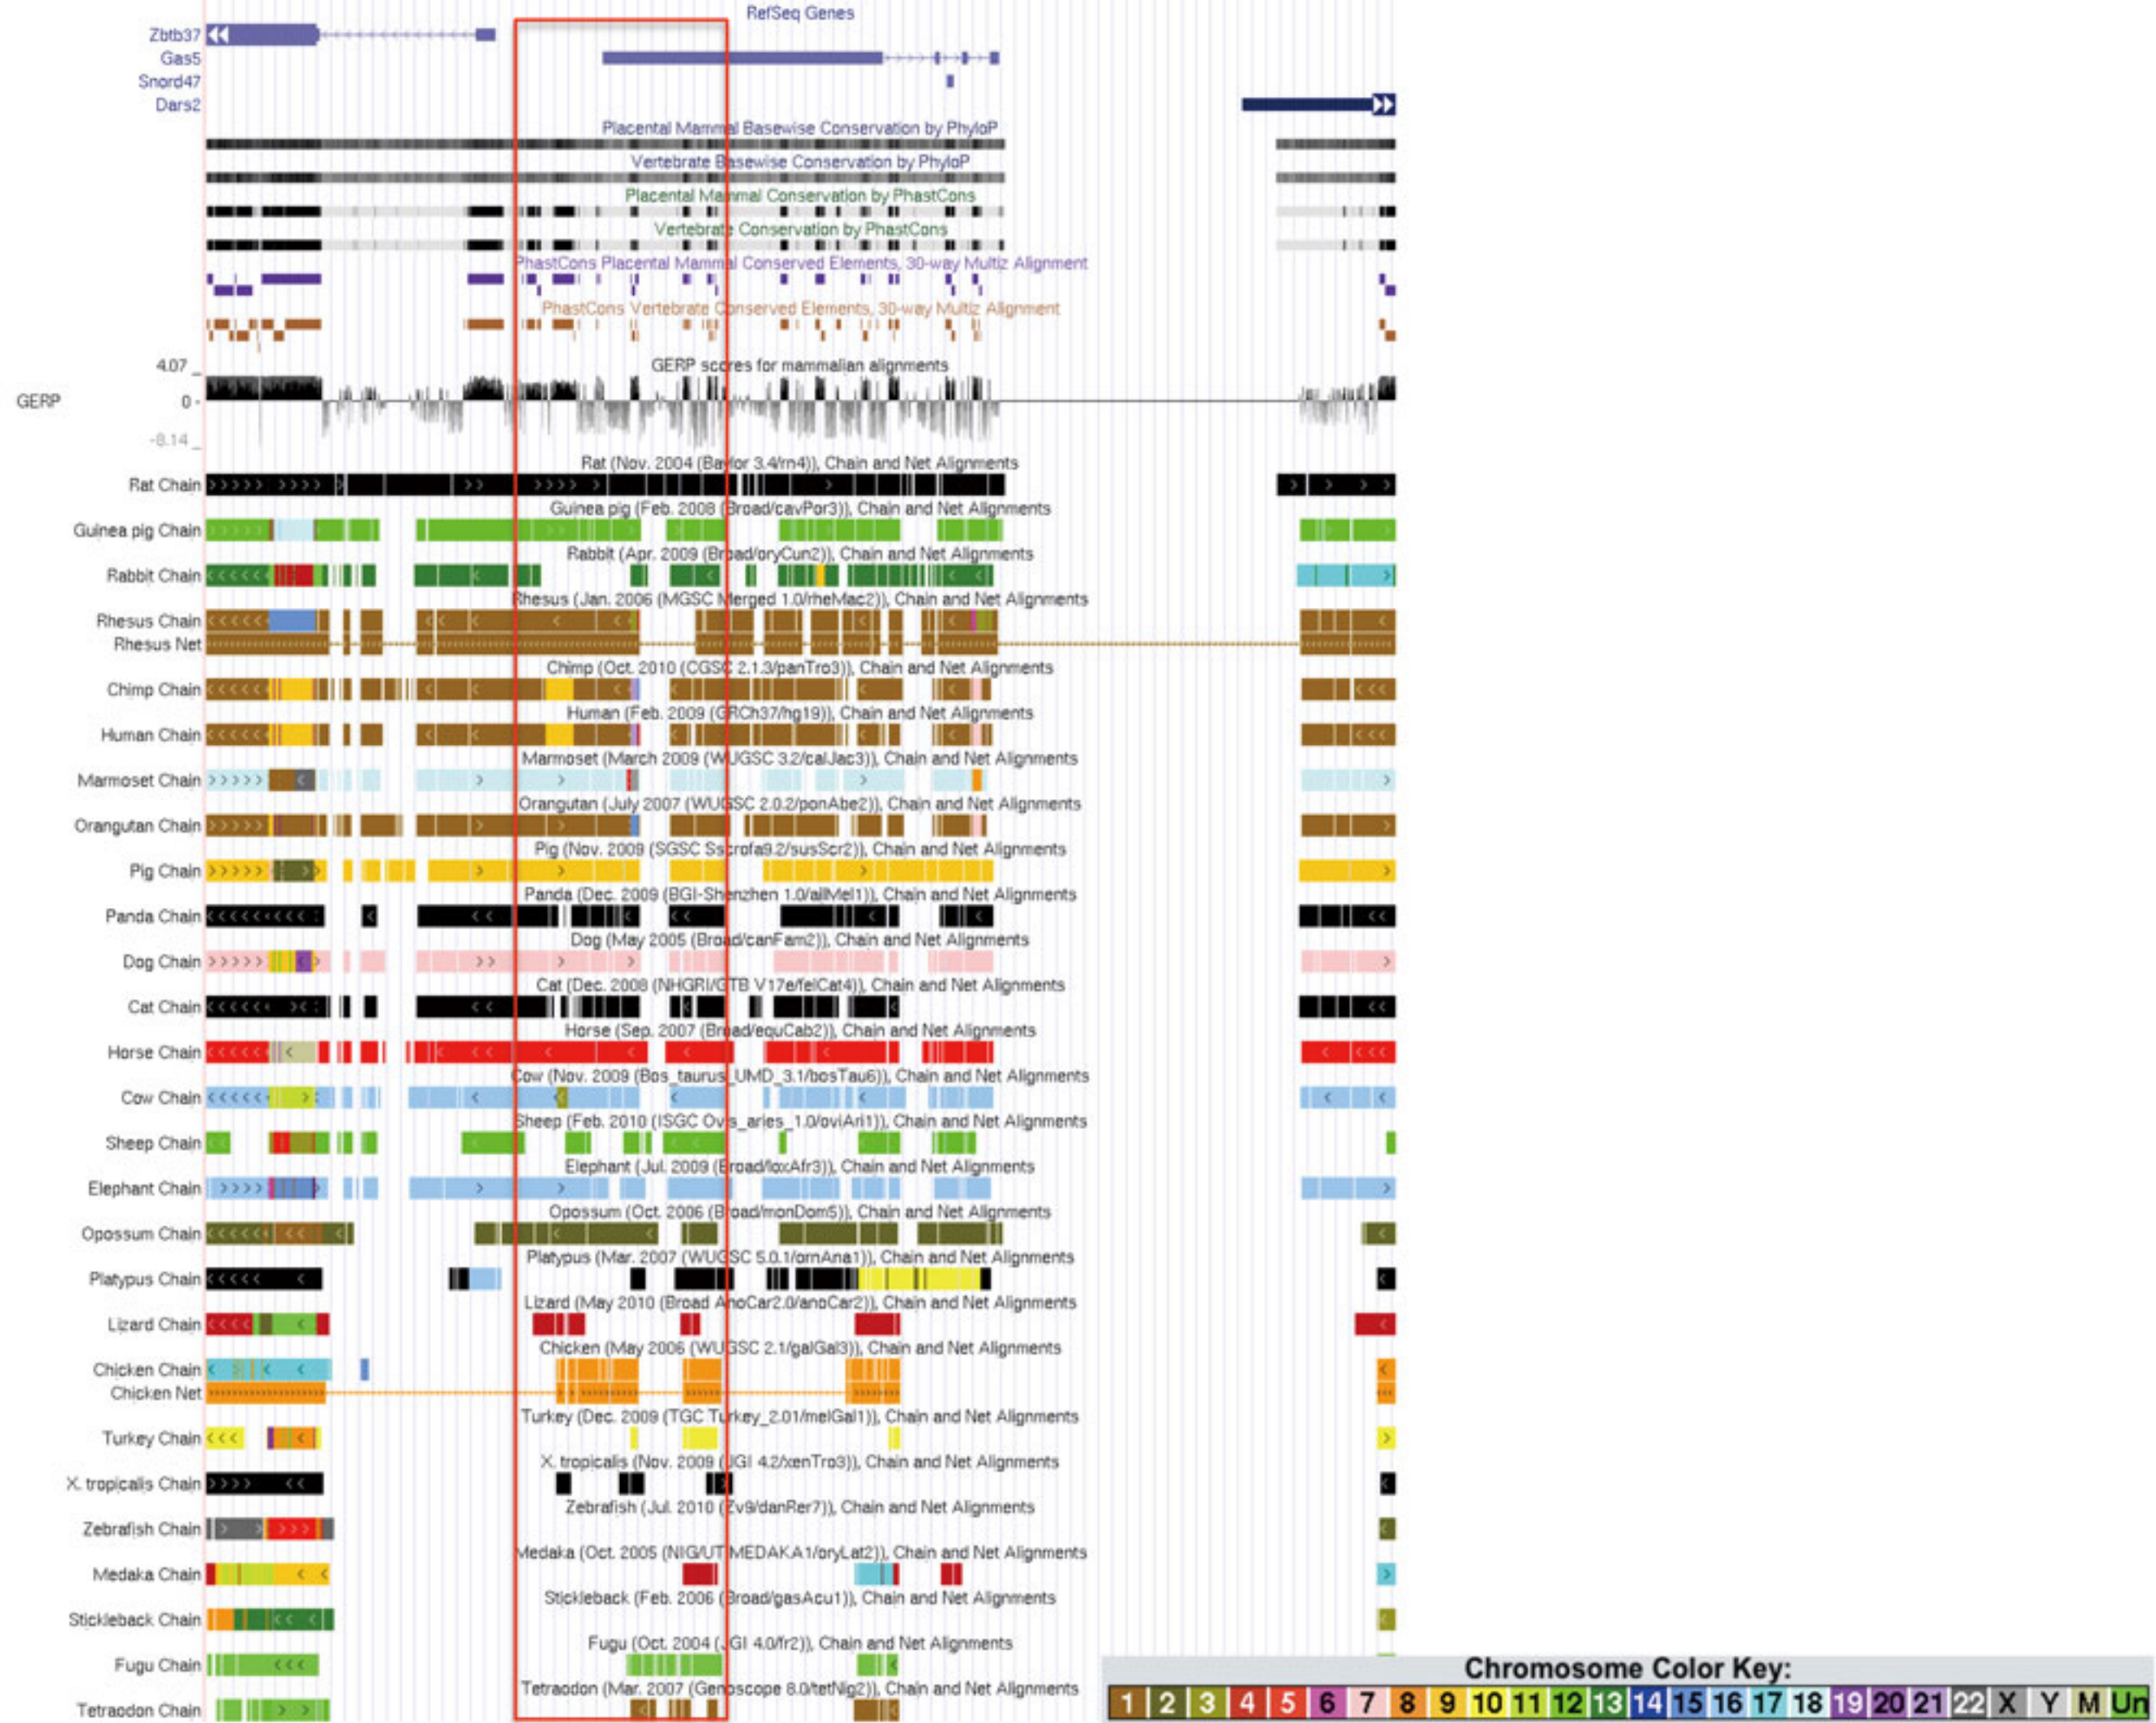

Supplement: 13287_2018_813_MOESM1_ESM.pdf [file 13287_2018_813_MOESM1_ESM.pdf]
