# Supplementary material for: Gas5 is an essential lncRNA regulator for self-renewal and pluripotency of mouse embryonic stem cells and induced pluripotent stem cells
Source: PubMed Central journal article supplement (PMC5863440; doi:10.1186/s13287-018-0813-5), 2018-03-21
Supplement: 13287_2018_813_MOESM3_ESM.pdf [file 13287_2018_813_MOESM3_ESM.pdf]

12 putative sites were predicted with these settings (80%) in sequence named **mm10\_dna**

| Model ID | Model name | Score  | Relative score    | Start | End  | Strand | predicted site sequence |
|----------|------------|--------|-------------------|-------|------|--------|-------------------------|
| MA0147.2 | Myc        | 2.312  | 0.808753288823443 | 226   | 235  | -1     | CCTTGTGGTA              |
| MA0147.2 | Myc        | 2.764  | 0.815387515152996 | 767   | 776  | -1     | ACCTGTGCGC              |
| MA0147.2 | Myc        | 2.417  | 0.810294425470795 | 1173  | 1182 | -1     | GCACGTCGCT              |
| MA0147.2 | Myc        | 3.708  | 0.829243067487283 | 1175  | 1184 | 1      | CGACGTGCCG              |
| MA0147.2 | Myc        | 2.509  | 0.811644754723713 | 1608  | 1617 | -1     | GCTTGTGCC               |
| MA0147.2 | Myc        | 2.128  | 0.806052630317607 | 1800  | 1809 | -1     | GCACGAGGTG              |
| MA0059.1 | MAX::MYC   | 8.761  | 0.820018255684475 | 1801  | 1811 | -1     | GTGCACGAGGT             |
| MA0147.2 | Myc        | 4.567  | 0.841851033011809 | 1802  | 1811 | 1      | CCTCGTGAC               |
| MA0059.1 | MAX::MYC   | 10.612 | 0.866821922870984 | 1835  | 1845 | 1      | AGCCACGCGGT             |
| MA0147.2 | Myc        | 5.230  | 0.851582210127944 | 1835  | 1844 | -1     | CCGCGTGGCT              |
| MA0059.1 | MAX::MYC   | 8.162  | 0.804872174298889 | 1836  | 1846 | -1     | CACCGCGTGGC             |
| MA0147.2 | Myc        | 4.940  | 0.847325737482878 | 1837  | 1846 | 1      | CCACGCGGTG              |

13 putative sites were predicted with these settings (85%) in sequence named **mm10\_dna**

| Model ID | Model name   | Score  | Relative score    | Start | End  | Strand | predicted site sequence |
|----------|--------------|--------|-------------------|-------|------|--------|-------------------------|
| MA0142.1 | Pou5f1::Sox2 | 12.330 | 0.852552694229211 | 17    | 31   | 1      | AATTCACATGCAGAG         |
| MA0147.2 | Myc          | 5.700  | 0.858480631311329 | 18    | 27   | -1     | GCATGTGAAT              |
| MA0143.3 | Sox2         | 6.426  | 0.866245447682085 | 273   | 280  | 1      | CCAATGTT                |
| MA0143.3 | Sox2         | 5.849  | 0.856009972708171 | 422   | 429  | 1      | CCTTTTTTC               |
| MA0143.3 | Sox2         | 5.849  | 0.856009972708171 | 473   | 480  | 1      | CCTCTGTC                |
| MA0143.3 | Sox2         | 6.693  | 0.870981793987171 | 527   | 534  | 1      | CCTTTTTT                |
| MA0143.3 | Sox2         | 5.849  | 0.856009972708171 | 953   | 960  | -1     | CCTTTGGC                |
| MA0792.1 | POU5F1B      | 9.498  | 0.893480897244067 | 1531  | 1539 | 1      | TATGCAATT               |
| MA0143.3 | Sox2         | 5.849  | 0.856009972708171 | 1708  | 1715 | -1     | TCTTTGTC                |
| MA0059.1 | MAX::MYC     | 10.612 | 0.866821922870984 | 1853  | 1863 | 1      | AGCCACGCGGT             |
| MA0147.2 | Myc          | 5.230  | 0.851582210127944 | 1853  | 1862 | -1     | CCGCGTGGCT              |
| MA0143.3 | Sox2         | 5.849  | 0.856009972708171 | 1918  | 1925 | 1      | CCTTAGTC                |
| MA0143.3 | Sox2         | 6.693  | 0.870981793987171 | 1929  | 1936 | -1     | TCTTTGTT                |

**Comment:** This type of analysis has a high sensitivity but abysmal selectivity. In other words: while true functional will be detected in most cases, most predictions will correspond to sites bound in vitro but with no function in vivo. A number of additional constraints of the analysis can improve the prediction; phylogenetic footprinting is the most common. We recommend using the [ConSite](#) service, which uses the JASPAR datasets.

The review [Nat Rev Genet. 2004 Apr;5\(4\):276-87](#) gives a comprehensive overview of transcription binding site prediction
